# Supplementary material for: Targeting a cell surface vitamin D receptor on tumor-associated macrophages in triple-negative breast cancer
Source: eLife. 2021 Jun 1;10:e65145. doi: 10.7554/eLife.65145 (PMC8169110; doi:10.7554/eLife.65145)
Supplement: Supplementary file 1. [file elife-65145-supp1.xlsx]

## Sheet: Sheet1
	Supplementary File 1. MS/MS analysis of CSSTRESAC-binding proteins isolated by peptide affinity chromatography.
	Protein Mass	Number of peptides	Protein Identification
	57160	20	PDIA3 (93.069% identity between human and murine proteins
	51898.8	6	Adenylyl cyclase associated protein (94.105% identity between human and murine proteins
	54512.7	5	Vitamin D-binding protein (DBP) (77.731% identity between human and murine proteins
