# Supplementary material for: Targeting a cell surface vitamin D receptor on tumor-associated macrophages in triple-negative breast cancer
Source: eLife. 2021 Jun 1;10:e65145. doi: 10.7554/eLife.65145 (PMC8169110; doi:10.7554/eLife.65145)
Supplement: Supplementary file 2. [file elife-65145-supp2.docx]

| **Parameter** | **Values** | **Units** |
| --- | --- | --- |
|  |  | day-1 |
|  |  | mm3day-1(mg/mm3)-1 |
|  |  | mm3day-1 |
|  |  | mM |
|  |  | day-1 |
|  |  | mm3 |
|  |  | day-1 |
|  |  | day-1 |
